# Supplementary material for: Dielectric relaxation of ice in a partially crystallized poly(N-isopropylacrylamide)microgel suspension compared to other partially crystalized polymer–water mixtures
Source: Royal Society of Chemistry journal article supplement (doi:10.1039/d3cp02116e), 2023-01-01

### Supplementary File: Individual Comparisons of Partially Crystallized Polymer-Water Mixtures with Pure Ice

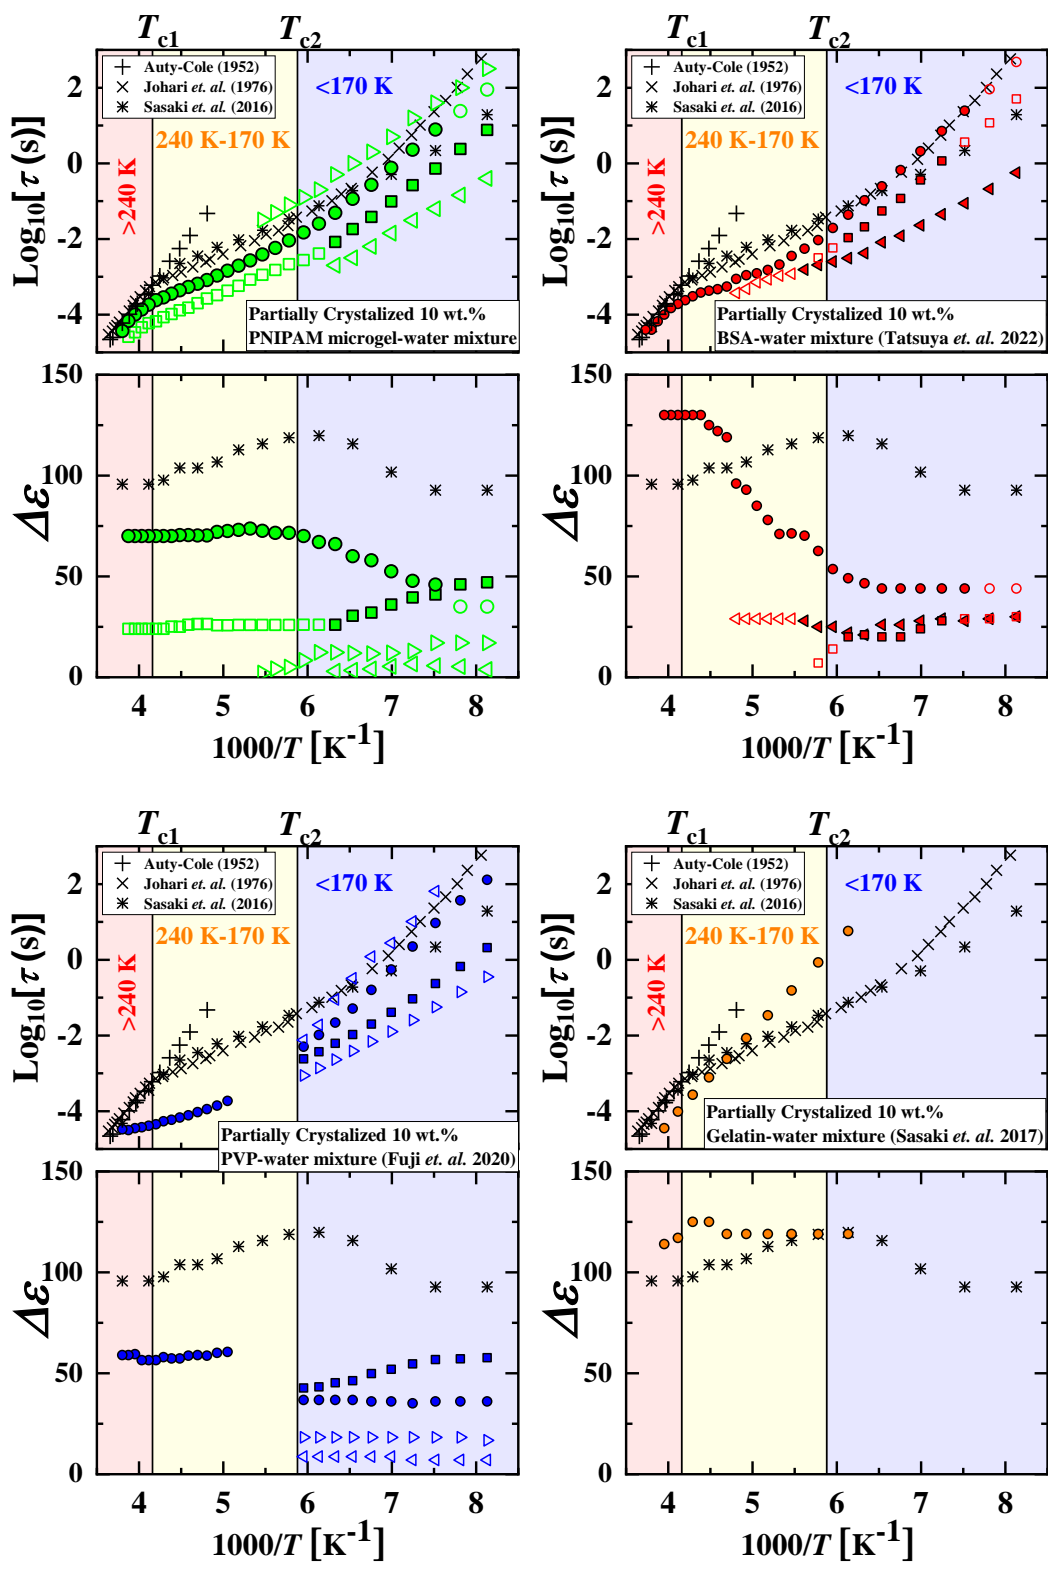

Supplement: d3cp02116e1.pdf [file d3cp02116e1.pdf]
